# Supplementary figures and images for: AGENCY COST TO DIVIDEND PAYOUT RATIOAGENCY COST TERHADAP DIVIDEND PAYOUT RATIO
Source: eLife journal article supplement (doi:10.7554/elife.60751), 2011-10-01

**A**

Top View

Side View

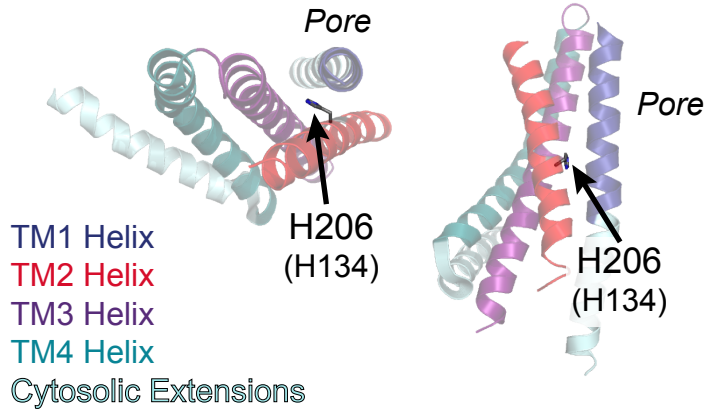**B**

Orai1 H134 Mutant Currents

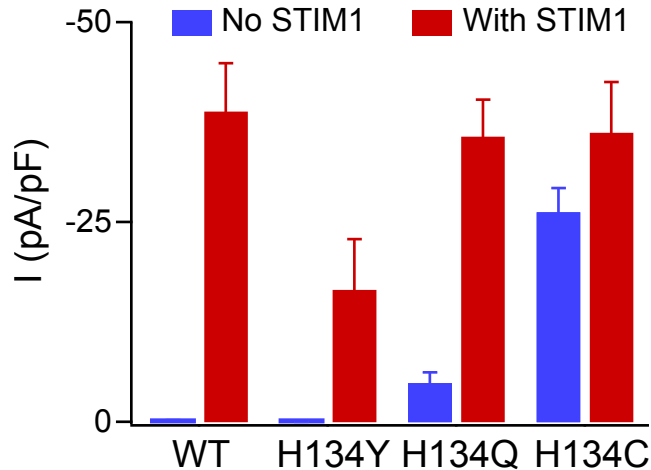

Supplement: supp [file elife_poa_e60751_Figure_2_figure_supplement_1.pdf › elife_poa_e60751_Figure_2_figure_supplement_1.pdf]

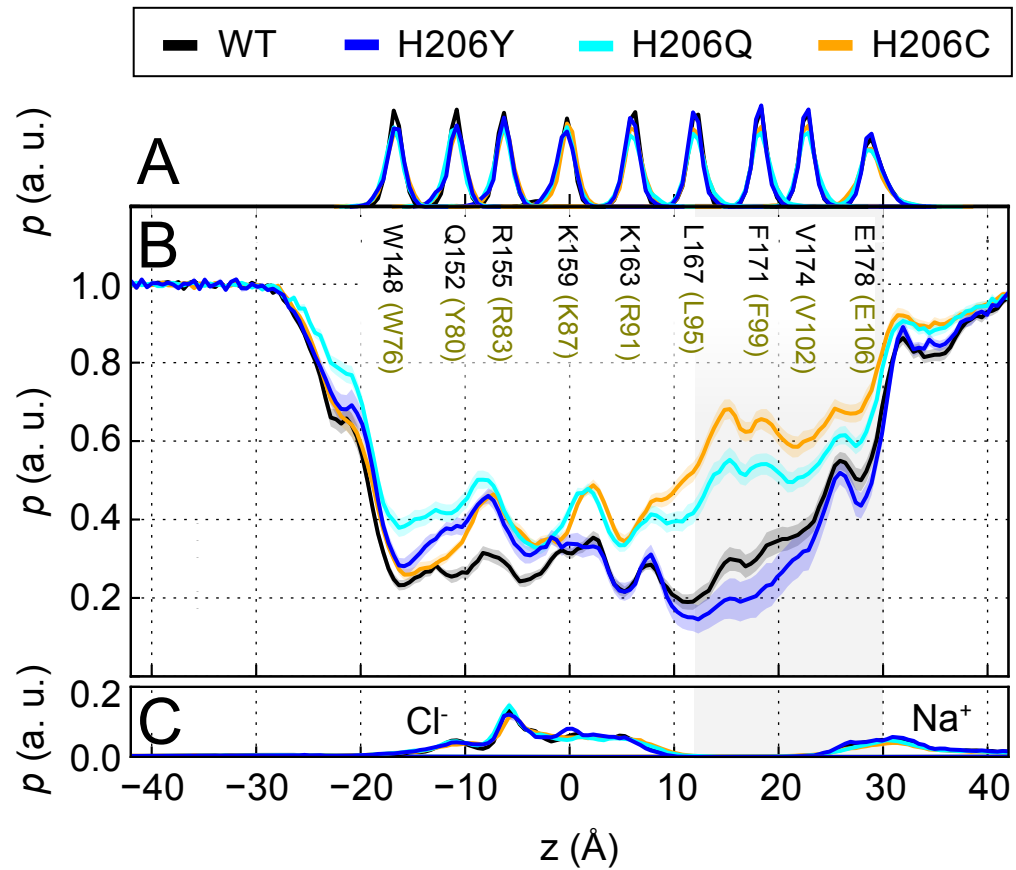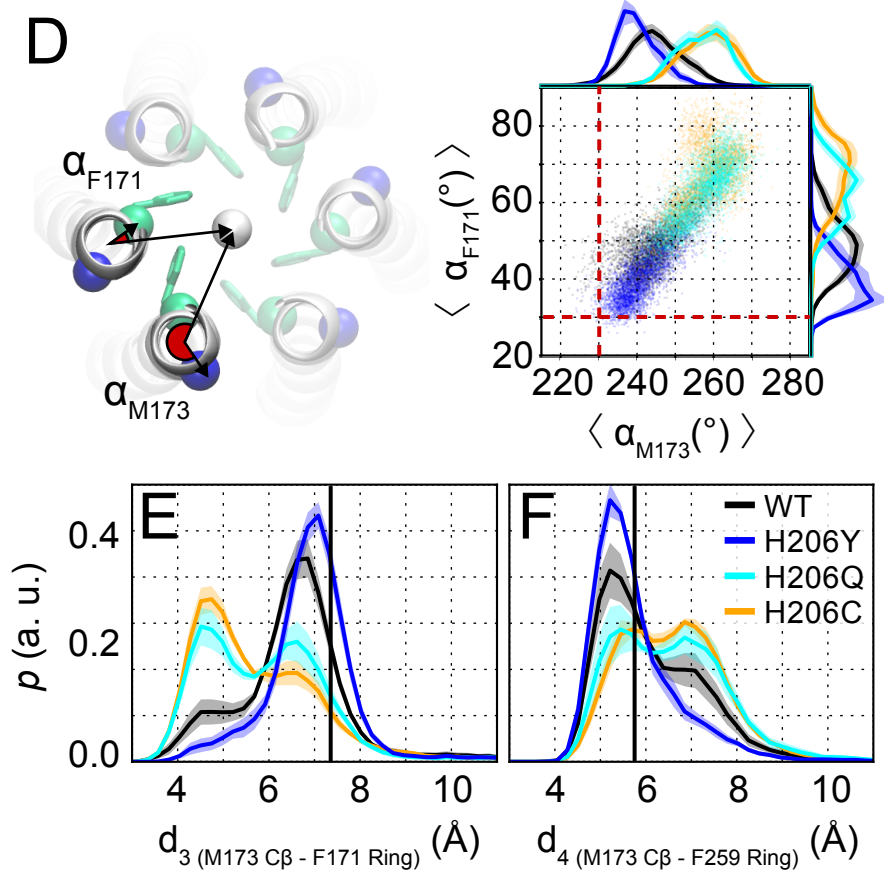

Supplement: supp [file elife_poa_e60751_Figure_2_figure_supplement_2.pdf › elife_poa_e60751_Figure_2_figure_supplement_2.pdf]

**A****F99C/M101C**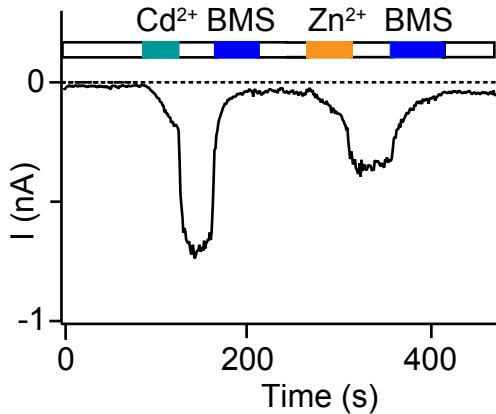**B****M101C/F187C**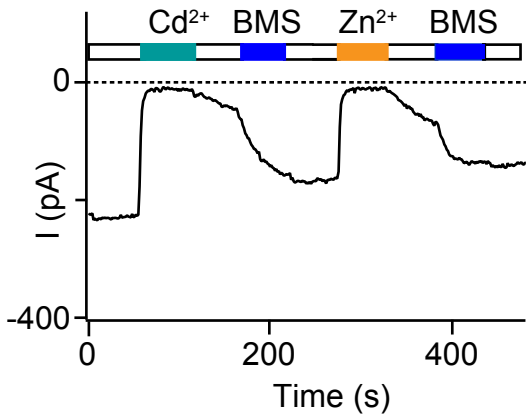

Supplement: supp [file elife_poa_e60751_Figure_3_figure_supplement_1.pdf › elife_poa_e60751_Figure_3_figure_supplement_1.pdf]

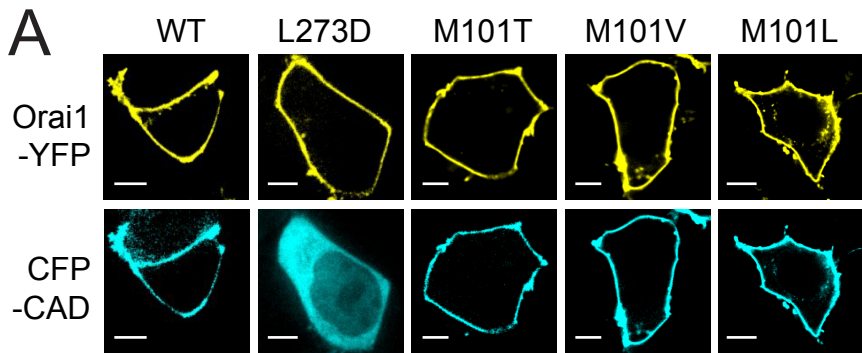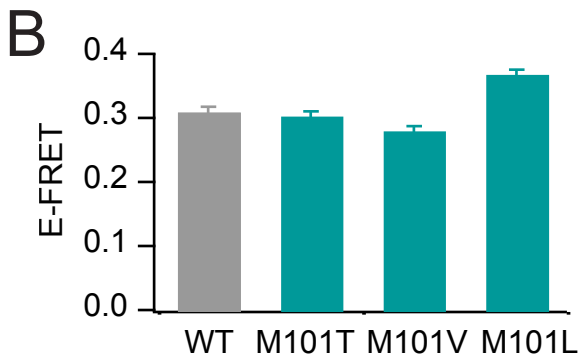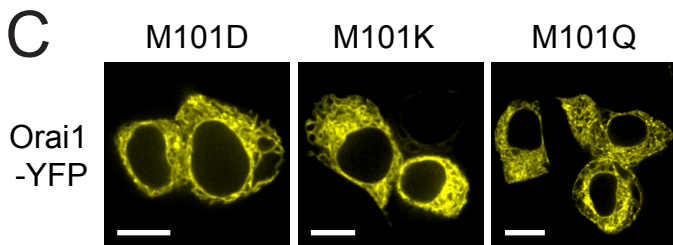

Supplement: supp [file elife_poa_e60751_Figure_5_figure_supplement_1.pdf › elife_poa_e60751_Figure_5_figure_supplement_1.pdf]

**A****H134S + M101 Mutant**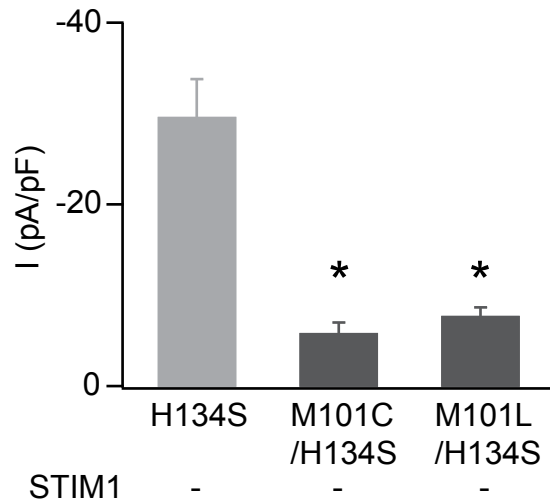**B****V102C + M101L**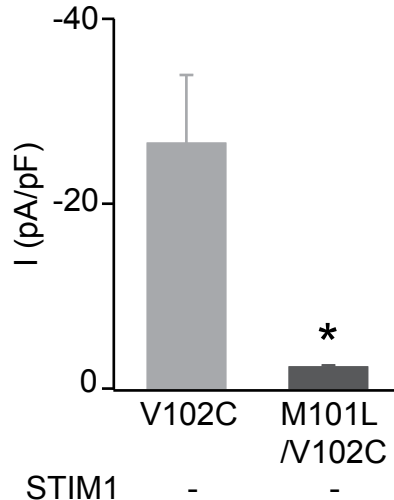**C****H134W + M101F**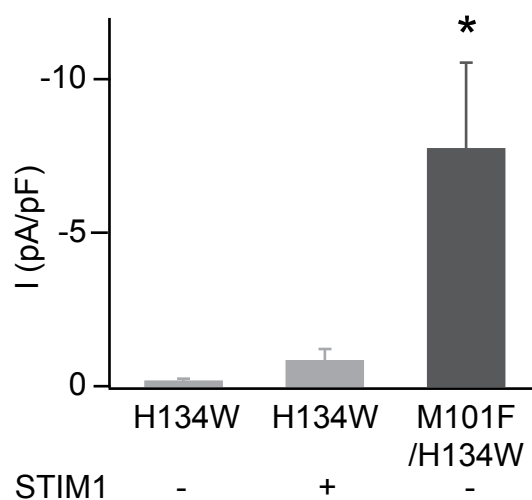

Supplement: supp [file elife_poa_e60751_Figure_5_figure_supplement_2.pdf › elife_poa_e60751_Figure_5_figure_supplement_2.pdf]

## Orai1 F187 Mutants

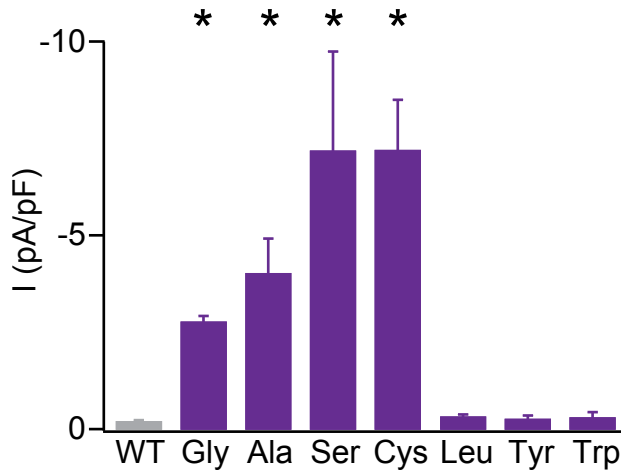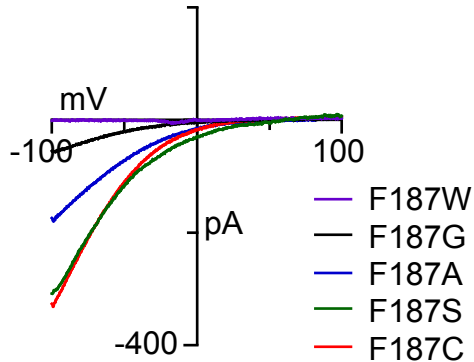

Supplement: supp [file elife_poa_e60751_Figure_5_figure_supplement_3.pdf › elife_poa_e60751_Figure_5_figure_supplement_3.pdf]
